# Supplementary material for: <em>Leptospermum scoparium</em> (Mānuka) and <em>Cryptomeria japonica</em> (Sugi) Leaf Essential Oil Seasonal Chemical Variation and Their Effect on Antimicrobial Activity
Source: Preprints.org preprint supplement (doi:10.20944/preprints202008.0623.v1), 2020-08-27
Supplement: Supplementary file 1 [file supplementary]

**Supplementary Material 1**

Total composition of Sugi leaf essential oils obtained via steam distillation in February and August analysed through Gas chromatography – Mass spectrometry. The relative proportions (% of total area) of each compound identified by the NIST 2017 mass spectral library are reported.

| **No.** | **CAS No.** | **RT** | **m/z** | **Compound** | **Average Peak Area (%)** | |
| --- | --- | --- | --- | --- | --- | --- |
| **Feb** | **August** |
| 1 | 508327 | 4.04 | 93 | α-Tricyclene | 0.72 ± 0.22 | 0.70 ± 0.05 |
| 2 | 2867052 | 4.14 | 93 | α-Thujene | 6.92 ± 0.15 | 4.80 ± 0.03 |
| 3 | 80568 | 4.25 | 91 | α-Pinene | 12.41 ± 0.06 | 12.09 ± 0.04 |
| 4 | 471841 | 4.54 | 93 | Fenchene | 0.28 ± 0.06 | 0.22 ± 0.12 |
| 5 | 79925 | 4.60 | 93 | Camphene | 2.96 ± 0.05 | 3.15 ± 0.04 |
| 6 | 111273 | 4.70 | 56 | 1-Hexanol | 0.00 ± 0.16 | 0.03 ± 0.17 |
| 7 | 997011786 | 4.73 | 57 | trans-2-Hexenol | 0.00 ± 0.03 | 0.02 ± 0.03 |
| 8 | 36262096 | 4.75 | 91 | Thuja-2,4(10)-diene | 0.04 ± 0.04 | 0.01 ± 0.08 |
| 9 | 997044599 | 4.83 | 91 | Verbenene | 0.01 ± 0.04 | 0.00 ± 0.05 |
| 10 | 555102 | 5.28 | 77 | p-Menth-2-ene | 11.22 ± 0.05 | 9.22 ± 0.02 |
| 11 | 3479898 | 5.33 | 119 | 3,7,7-Trimethylcyclohepta-1,3,5-triene | 0.02 ± 0.03 | 0.01 ± 0.02 |
| 12 | 123353 | 5.59 | 93 | β-Myrcene | 7.48 ± 0.02 | 6.19 ± 0.01 |
| 13 | 13466789 | 5.84 | 93 | 3-Carene | 6.95 ± 0.02 | 5.22 ± 0.05 |
| 14 | 1124272 | 6.04 | 95 | p-Menth-4(8)-ene | 0.00 ± 0.02 | 0.00 ± 0.03 |
| 15 | 4497921 | 6.20 | 93 | 2- Carene | 5.97 ± 0.02 | 5.33 ± 0.02 |
| 16 | 5989275 | 6.44 | 68 | D-Limonene | 5.02 ± 0.03 | 6.42 ± 0.04 |
| 17 | 488971 | 6.62 | 93 | Cyclofenchene | 2.01 ± 0.01 | 1.98 ± 0.02 |
| 18 | 6874108 | 6.77 | 93 | α-Ocimene | 0.02 ± 0.03 | 0.01 ± 0.05 |
| 19 | 99876 | 6.87 | 119 | p-Cymene | 1.49 ± 0.02 | 10.52 ± 0.03 |
| 20 | 53907725 | 7.13 | 57 | 1-Octen-3-ol | 0.01 ± 0.01 | 0.12 ± 0.02 |
| 21 | 13877913 | 7.15 | 93 | β-Ocimene | 0.20 ± 0.02 | 0.06 ± 0.03 |
| 22 | 113687244 | 7.16 | 121 | 1,4-Hexadiene, 5-methyl-3-(1-methylethylidene)- | 0.04 ± 0.03 | 0.01 ± 0.02 |
| 23 | 99854 | 7.33 | 93 | γ-Terpinene | 9.28 ± 0.02 | 9.95 ± 0.03 |
| 24 | 31883984 | 7.64 | 67 | 3-Methylcyclohex-3-en-1-one | 0.00 ± 0.02 | 0.01 ± 0.01 |
| 25 | 19686794 | 7.65 | 68 | Cyclohept-4-enone | 0.00 ± 0.00 | 0.01 ± 0.01 |
| 26 | 586630 | 8.14 | 93 | Isoterpinolene | 2.72 ± 0.01 | 2.90 ± 0.00 |
| 27 | 19945610 | 9.25 | 69 | (E)-4,8-Dimethylnona-1,3,7-triene | 0.47 ± 0.02 | 0.11 ± 0.02 |
| 28 | 997042023 | 9.26 | 132 | p-(1-Propenyl)-toluene | 0.06 ± 0.01 | 0.05 ± 0.01 |
| 29 | 18368951 | 9.48 | 119 | p-Mentha-1,3,8-triene | 0.01 ± 0.01 | 0.00 ± 0.01 |
| 30 | 546792 | 9.63 | 43 | 4-Thujanol | 0.03 ± 0.00 | 0.02 ± 0.00 |
| 31 | 43219687 | 9.97 | 109 | 1,4-Dimethyl-δ-3-tetrahydroacetophenone | 0.00 ± 0.00 | 0.00 ± 0.00 |
| 32 | 2442106 | 10.28 | 43 | 1-Octen-3-yl-acetate | 0.19 ± 0.01 | 0.11 ± 0.00 |
| 33 | 21195595 | 10.32 | 91 | p-Mentha-1,3,8-triene | 0.02 ± 0.01 | 0.00 ± 0.01 |
| 34 | 931362 | 10.41 | 109 | Imidazole, 2-ethyl-4-methyl- | 0.00 ± 0.01 | 0.00 ± 0.01 |
| 35 | 4864613 | 10.46 | 43 | 3-Octanol, acetate | 0.25 ± 0.01 | 0.11 ± 0.01 |
| 36 | 111115 | 10.64 | 74 | Octanoic acid, methyl ester | 0.00 ± 0.01 | 0.01 ± 0.01 |
| 37 | 53981694 | 10.67 | 43 | 2-acetylimidazole | 0.01 ± 0.01 | 0.00 ± 0.01 |
| 38 | 78706 | 10.84 | 71 | Linalool | 0.50 ± 0.01 | 0.78 ± 0.00 |
| 39 | 112403 | 10.94 | 57 | Dodecane | 0.00 ± 0.01 | 0.02 ± 0.00 |
| 40 | 17699160 | 11.09 | 71 | trans-4-Thujanol | 0.02 ± 0.01 | 0.01 ± 0.00 |
| 41 | 32543514 | 11.29 | 43 | cis-(-)-1,2-Epoxy-p-menth-8-ene | 0.00 ± 0.01 | 0.00 ± 0.00 |
| 42 | 997077349 | 11.52 | 109 | trans-3-Caren-2-ol | 0.07 ± 0.00 | 0.05 ± 0.00 |
| 43 | 55722593 | 11.53 | 81 | 3,6-Octadienal, 3,7-dimethyl- | 0.15 ± 0.00 | 0.12 ± 0.01 |
| 44 | 997083731 | 11.53 | 69 | Isopulegol | 0.11 ± 0.01 | 0.10 ± 0.00 |
| 45 | 29803825 | 11.54 | 43 | cis-p-Menth-2-en-1-ol | 0.15 ± 0.00 | 0.17 ± 0.00 |
| 46 | 53783872 | 11.86 | 79 | (anti)-7-Hydroxy-nor-bornene | 0.00 ± 0.01 | 0.08 ± 0.00 |
| 47 | 4017883 | 12.05 | 93 | Bicyclo[4.1.0]heptan-3-ol, 4,7,7-trimethyl-, [1R-(1α,3α,4β,6α)]- | 0.00 ± 0.00 | 0.01 ± 0.01 |
| 48 | 6617352 | 12.08 | 109 | 2-Caren-4-ol | 0.00 ± 0.00 | 0.02 ± 0.00 |
| 49 | 3588189 | 12.18 | 95 | cis-Tagetone | 0.01 ± 0.00 | 0.00 ± 0.00 |
| 50 | 83321168 | 12.23 | 109 | 2,3,4-Trimethyl-2-cyclopenten-1-one | 0.00 ± 0.00 | 0.01 ± 0.00 |
| 51 | 3536547 | 12.38 | 92 | 4(10)-Thujen-3-ol | 0.00 ± 0.01 | 0.00 ± 0.00 |
| 52 | 29803814 | 12.62 | 93 | p-Menth-2-en-1-ol, trans | 0.05 ± 0.01 | 0.05 ± 0.00 |
| 53 | 465316 | 12.73 | 71 | 2-Norbornanol | 0.01 ± 0.01 | 0.03 ± 0.00 |
| 54 | 5113666 | 12.76 | 110 | p-Menth-4-en-3-one | 0.00 ± 0.00 | 0.00 ± 0.00 |
| 55 | 10458147 | 12.85 | 41 | p-Menthan-3-one | 0.02 ± 0.00 | 0.03 ± 0.00 |
| 56 | 76222 | 12.87 | 95 | Camphor | 0.04 ± 0.01 | 0.06 ± 0.00 |
| 57 | 5281016 | 12.91 | 91 | Sabinyl isobutanoate | 0.01 ± 0.00 | 0.02 ± 0.00 |
| 58 | 562743 | 13.43 | 71 | Terpinen-4-ol | 4.22 ± 0.00 | 6.64 ± 0.01 |
| 59 | 997077814 | 13.83 | 69 | 1,8-menthadien-4-ol | 0.01 ± 0.00 | 0.01 ± 0.00 |
| 60 | 70987814 | 13.86 | 109 | 1-(1,2,3-Trimethyl-cyclopent-2-enyl)-ethanone | 0.00 ± 0.00 | 0.03 ± 0.00 |
| 61 | 547604 | 13.86 | 55 | Pinocamphone | 0.00 ± 0.00 | 0.00 ± 0.00 |
| 62 | 16721383 | 14.27 | 84 | p-Menth-1-en-3-ol | 0.06 ± 0.00 | 0.07 ± 0.00 |
| 63 | 997077405 | 14.28 | 109 | 3-Isopropyl-6-methyl-7-oxabicyclo[4.1.0]hept-3-ene | 0.00 ± 0.00 | 0.01 ± 0.00 |
| 64 | 72347627 | 14.42 | 93 | 1,3-Cyclopentadiene, trimethyl- | 0.00 ± 0.00 | 0.01 ± 0.00 |
| 65 | 31574444 | 14.55 | 149 | Anisole, 2-isopropyl-4-methyl- | 0.01 ± 0.00 | 0.00 ± 0.00 |
| 66 | 470086 | 14.66 | 59 | α-Fenchol | 0.25 ± 0.00 | 0.57 ± 0.00 |
| 67 | 2153664 | 14.66 | 93 | Santrolina triene | 0.19 ± 0.00 | 0.44 ± 0.00 |
| 68 | 5113871 | 14.68 | 79 | Isolimonene | 0.06 ± 0.00 | 0.14 ± 0.00 |
| 69 | 1076568 | 14.81 | 149 | Methyl thymol ether | 0.02 ± 0.00 | 0.01 ± 0.00 |
| 70 | 16721394 | 15.32 | 84 | p-Menth-1-en-3-ol, trans- | 0.09 ± 0.00 | 0.10 ± 0.01 |
| 71 | 35628003 | 15.38 | 85 | Ipsdienol | 0.04 ± 0.00 | 0.02 ± 0.00 |
| 72 | 19780611 | 15.43 | 55 | 3-Ethyl-2-methyl-2-heptene | 0.00 ± 0.00 | 0.00 ± 0.00 |
| 73 | 5208377 | 15.65 | 43 | m-Cymen-8-ol | 0.01 ± 0.00 | 0.11 ± 0.00 |
| 74 | 115957 | 15.79 | 93 | Linalyl acetate | 0.33 ± 0.00 | 0.12 ± 0.00 |
| 75 | 498157 | 16.05 | 93 | (+)-3-Carene | 0.01 ± 0.00 | 0.00 ± 0.00 |
| 76 | 106252 | 16.38 | 69 | cis-Geraniol | 0.00 ± 0.00 | 0.00 ± 0.00 |
| 77 | 3536547 | 16.60 | 91 | 4(10)-Thujen-3-ol, acetate | 0.00 ± 0.00 | 0.01 ± 0.00 |
| 78 | 997077191 | 16.65 | 137 | (-)-m-Menthadien-6-trans-ol | 0.00 ± 0.00 | 0.02 ± 0.00 |
| 79 | 20307840 | 16.96 | 121 | δ-Elemene | 0.02 ± 0.00 | 0.01 ± 0.00 |
| 80 | 76493 | 17.17 | 95 | Bornyl acetate | 1.27 ± 0.00 | 1.26 ± 0.00 |
| 81 | 624157 | 17.62 | 69 | 3,7-Dimethyl-2,6-octadien-1-ol | 0.01 ± 0.00 | 0.01 ± 0.00 |
| 82 | 139757623 | 17.70 | 91 | trans-Sabinyl acetate | 0.22 ± 0.00 | 0.12 ± 0.00 |
| 83 | 89816 | 18.13 | 82 | Piperitone | 0.01 ± 0.00 | 0.01 ± 0.00 |
| 84 | 502498 | 18.15 | 55 | Cyclooctanone | 0.00 ± 0.00 | 0.02 ± 0.00 |
| 85 | 3856255 | 18.26 | 161 | Copaene | 0.03 ± 0.00 | 0.01 ± 0.00 |
| 86 | 110429 | 18.35 | 74 | Decanoic acid, methyl ester | 0.01 ± 0.00 | 0.01 ± 0.00 |
| 87 | 120503 | 18.67 | 105 | Benzoic acid, 2-methylpropyl ester | 0.01 ± 0.00 | 0.00 ± 0.00 |
| 88 | 5208593 | 18.84 | 81 | (-)-β-Bourbonene | 0.01 ± 0.00 | 0.01 ± 0.00 |
| 89 | 997044319 | 18.88 | 91 | 1(7),5,8-o-Menthatriene | 0.00 ± 0.00 | 0.01 ± 0.00 |
| 90 | 159407359 | 19.01 | 119 | 7-epi-Sesquithujene | 0.02 ± 0.00 | 0.01 ± 0.00 |
| 91 | 55870650 | 19.15 | 92 | 2,5-Methano-1H-inden-7-ol, octahydro- | 0.00 ± 0.00 | 0.00 ± 0.00 |
| 92 | 157477720 | 19.33 | 161 | cis-Muurola-4(15),5-diene | 0.03 ± 0.00 | 0.01 ± 0.00 |
| 93 | 997030793 | 19.45 | 95 | 5-Ocen-2-yn-4-ol | 0.00 ± 0.00 | 0.01 ± 0.00 |
| 94 | 997221371 | 19.62 | 107 | Cycloheptane, 4-methylene-1-methyl-2-(2-methyl-1-propen-1-yl)-1-vinyl- | 0.05 ± 0.00 | 0.03 ± 0.00 |
| 95 | 475207 | 19.72 | 161 | Longifolene | 0.00 ± 0.00 | 0.00 ± 0.00 |
| 96 | 35944220 | 19.87 | 119 | α-Cedrane | 0.04 ± 0.00 | 0.05 ± 0.00 |
| 97 | 79120982 | 20.09 | 69 | β-Funebrene | 0.02 ± 0.00 | 0.02 ± 0.00 |
| 98 | 546281 | 20.43 | 161 | β-Cedrane | 0.07 ± 0.00 | 0.05 ± 0.00 |
| 99 | 502614 | 20.69 | 41 | α-Farnesene | 0.04 ± 0.00 | 0.03 ± 0.00 |
| 100 | 87445 | 20.69 | 93 | Caryophyllene | 0.04 ± 0.00 | 0.03 ± 0.00 |
| 101 | 470406 | 20.82 | 119 | cis-Thujopsene | 0.05 ± 0.00 | 0.04 ± 0.00 |
| 102 | 21473370 | 20.85 | 109 | p-Menth-2-ene-1,4-diol, trans- | 0.01 ± 0.00 | 0.16 ± 0.00 |
| 103 | 29873992 | 20.99 | 121 | γ-Elemene | 0.00 ± 0.00 | 0.00 ± 0.00 |
| 104 | 1703522 | 21.04 | 95 | Furan, 2-ethyl-5-methyl- | 0.00 ± 0.00 | 0.03 ± 0.00 |
| 105 | 29837125 | 21.07 | 119 | Cubenene | 0.01 ± 0.00 | 0.01 ± 0.00 |
| 106 | 997220786 | 21.11 | 161 | cis-muurola-3,5-diene | 0.00 ± 0.00 | 0.00 ± 0.00 |
| 107 | 105873 | 21.21 | 69 | Geranyl acetate | 0.02 ± 0.00 | 0.01 ± 0.00 |
| 108 | 267665203 | 21.59 | 161 | Cadina-3,5-diene | 0.12 ± 0.00 | 0.03 ± 0.00 |
| 109 | 41432706 | 21.60 | 91 | β-Longipinene | 0.04 ± 0.00 | 0.01 ± 0.00 |
| 110 | 2306787 | 21.62 | 43 | Nerolidyl acetate | 0.01 ± 0.00 | 0.02 ± 0.00 |
| 111 | 997034546 | 22.15 | 109 | (3S,4S)-Hept-1-en-6-yne-3,4-diol | 0.01 ± 0.00 | 0.14 ± 0.00 |
| 112 | 997220980 | 22.18 | 69 | Isocaryophyllene | 0.09 ± 0.00 | 0.04 ± 0.00 |
| 113 | 6753986 | 22.19 | 93 | α-Humulene | 0.13 ± 0.00 | 0.07 ± 0.00 |
| 114 | 28973979 | 22.20 | 41 | β-cis-Farnesene | 0.07 ± 0.00 | 0.04 ± 0.00 |
| 115 | 729602942 | 22.33 | 119 | 4-epi-α-Acoradiene | 0.02 ± 0.00 | 0.02 ± 0.00 |
| 116 | 16729003 | 22.46 | 161 | Cadina-1(6),4-diene | 0.24 ± 0.00 | 0.09 ± 0.00 |
| 117 | 89838 | 22.58 | 135 | p-Cymen-3-ol | 0.00 ± 0.00 | 0.01 ± 0.00 |
| 118 | 30021740 | 22.70 | 161 | γ-Muurolene | 0.11 ± 0.00 | 0.04 ± 0.01 |
| 119 | 997019031 | 22.86 | 97 | 2-Methyl-2-cyclohexen-1-ol | 0.00 ± 0.00 | 0.15 ± 0.00 |
| 120 | 931351 | 22.88 | 112 | 2-ethyl-4-methyl-2-imidazoline | 0.00 ± 0.00 | 0.15 ± 0.00 |
| 121 | 28976672 | 22.92 | 119 | β-Curcumene | 0.01 ± 0.00 | 0.01 ± 0.00 |
| 122 | 1670468 | 22.93 | 43 | Cyclopentanone, 2-acetyl- | 0.00 ± 0.00 | 0.01 ± 0.00 |
| 123 | 997121419 | 22.98 | 126 | (1S,2S,5R)-2-Methyl-5-(propan-2-yl)-cyclohex-3-ene-1,2-diol | 0.00 ± 0.00 | 0.01 ± 0.01 |
| 124 | 0 | 23.13 | 205 | Cedramene | 0.00 ± 0.00 | 0.00 ± 0.00 |
| 125 | 99529789 | 23.22 | 121 | β-Alaskene | 0.02 ± 0.00 | 0.01 ± 0.01 |
| 126 | 23986745 | 23.40 | 161 | (-)-Germacrene D | 0.22 ± 0.00 | 0.14 ± 0.00 |
| 127 | 95910364 | 23.59 | 161 | Isoledene | 0.31 ± 0.00 | 0.13 ± 0.00 |
| 128 | 10208807 | 23.60 | 105 | α-Muurolene | 0.33 ± 0.00 | 0.16 ± 0.00 |
| 129 | 5956092 | 23.89 | 207 | β-Agarofuran, dihydro- | 0.02 ± 0.00 | 0.02 ± 0.00 |
| 130 | 495614 | 23.96 | 69 | β-Bisabolene | 0.02 ± 0.00 | 0.01 ± 0.00 |
| 131 | 39029419 | 24.25 | 161 | γ-Cadinene | 0.33 ± 0.00 | 0.12 ± 0.00 |
| 132 | 483761 | 24.50 | 161 | δ-Cadinene | 1.22 ± 0.00 | 0.71 ± 0.00 |
| 133 | 41929059 | 24.68 | 161 | Zonarene | 0.05 ± 0.00 | 0.04 ± 0.00 |
| 134 | 77026881 | 24.85 | 93 | (3R,6R)-3-Hydroperoxy-3-methyl | 0.01 ± 0.00 | 0.01 ± 0.00 |
| 135 | 53585130 | 24.87 | 107 | trans-γ-Bisabolene | 0.01 ± 0.00 | 0.01 ± 0.00 |
| 136 | 16728997 | 24.97 | 119 | Cadine-1,4-diene | 0.06 ± 0.00 | 0.03 ± 0.00 |
| 137 | 150320528 | 25.11 | 161 | Bicyclo[4.4.0]dec-1-ene, 2-isopropyl-5-methyl-9-methylene- | 0.05 ± 0.00 | 0.02 ± 0.00 |
| 138 | 24406051 | 25.11 | 105 | α-Cadinene | 0.08 ± 0.00 | 0.03 ± 0.00 |
| 139 | 483772 | 25.38 | 159 | Calamenene | 0.01 ± 0.00 | 0.11 ± 0.00 |
| 140 | 4630073 | 25.74 | 161 | Valencen | 0.01 ± 0.00 | 0.00 ± 0.00 |
| 141 | 997229163 | 25.77 | 207 | [1,2,4]Triazolo[1,5-a]pyrimidine-6-carboxylic acid, 4,7-dihydro-7-imino-, ethyl ester | 0.01 ± 0.00 | 0.01 ± 0.00 |
| 142 | 116029 | 26.18 | 109 | Dihydroisophorone | 0.00 ± 0.00 | 0.02 ± 0.00 |
| 143 | 25246279 | 26.26 | 41 | (+)-Aromadendrene | 0.02 ± 0.00 | 0.01 ± 0.00 |
| 144 | 15423571 | 26.26 | 121 | Germacrene B | 0.04 ± 0.00 | 0.02 ± 0.00 |
| 145 | 21391991 | 26.41 | 157 | α-Calacorene | 0.01 ± 0.00 | 0.01 ± 0.00 |
| 146 | 23445025 | 26.85 | 161 | Cubebol | 0.01 ± 0.00 | 0.00 ± 0.00 |
| 147 | 15981916 | 27.25 | 125 | 5-Methylisocytosine | 0.00 ± 0.00 | 0.01 ± 0.00 |
| 148 | 997030792 | 27.59 | 95 | 5-Octen-2-yn-4-ol | 0.00 ± 0.00 | 0.01 ± 0.00 |
| 149 | 40716663 | 28.52 | 69 | α-Nerolidol | 0.06 ± 0.00 | 0.02 ± 0.00 |
| 150 | 560327 | 28.72 | 107 | α-Patchoulene | 0.82 ± 0.00 | 0.39 ± 0.00 |
| 151 | 28624284 | 28.75 | 161 | δ-Selinene, (+)- | 0.95 ± 0.00 | 0.45 ± 0.00 |
| 152 | 639996 | 28.77 | 59 | 10-epi-Elemol | 1.43 ± 0.00 | 0.68 ± 0.00 |
| 153 | 17066670 | 28.79 | 105 | β-Selinene | 0.41 ± 0.00 | 0.19 ± 0.00 |
| 154 | 198991796 | 29.06 | 81 | Germacren D-4-ol | 0.03 ± 0.00 | 0.00 ± 0.00 |
| 155 | 25152856 | 29.29 | 105 | 3-Hexen-1-ol, benzoate, (Z)- | 0.01 ± 0.00 | 0.01 ± 0.00 |
| 156 | 50657302 | 29.62 | 149 | Allocedrol | 0.00 ± 0.00 | 0.00 ± 0.00 |
| 157 | 1139306 | 29.67 | 43 | Caryophyllene oxide | 0.00 ± 0.00 | 0.01 ± 0.00 |
| 158 | 77532 | 30.07 | 95 | Cedrol | 0.63 ± 0.00 | 0.37 ± 0.00 |
| 159 | 489407 | 30.38 | 204 | α-Gurjunene | 0.07 ± 0.00 | 0.07 ± 0.00 |
| 160 | 514512 | 30.39 | 161 | β-Patchoulene | 0.10 ± 0.00 | 0.09 ± 0.00 |
| 161 | 79254469 | 30.46 | 59 | 2-Naphthalenemethanol | 0.03 ± 0.00 | 0.03 ± 0.00 |
| 162 | 19912675 | 30.57 | 119 | epi-α-Cubenol | 0.02 ± 0.00 | 0.02 ± 0.00 |
| 163 | 28305604 | 30.85 | 177 | β-Oplopenone | 0.04 ± 0.00 | 0.01 ± 0.00 |
| 164 | 1209718 | 31.28 | 189 | γ-Eudesmol | 0.91 ± 0.00 | 0.80 ± 0.00 |
| 165 | 5937111 | 31.41 | 161 | **τ**-Cadinol | 0.23 ± 0.00 | 0.09 ± 0.00 |
| 166 | 19912620 | 31.56 | 95 | **τ**-Muurolol | 0.10 ± 0.00 | 0.05 ± 0.00 |
| 167 | 128487467 | 31.57 | 121 | Spirojatamol | 0.08 ± 0.00 | 0.04 ± 0.00 |
| 168 | 23811087 | 31.72 | 161 | Hinesol | 0.02 ± 0.00 | 0.01 ± 0.00 |
| 169 | 481345 | 32.25 | 43 | α-Cadinol | 0.15 ± 0.00 | 0.07 ± 0.00 |
| 170 | 2387782 | 32.35 | 204 | Cyperene | 0.31 ± 0.00 | 0.19 ± 0.00 |
| 171 | 28624239 | 32.35 | 189 | δ-Selinene | 0.34 ± 0.00 | 0.21 ± 0.00 |
| 172 | 79254469 | 32.36 | 59 | α-Eudesmol | 0.90 ± 0.00 | 0.52 ± 0.00 |
| 173 | 63891612 | 32.39 | 149 | Rosifoliol | 0.76 ± 0.00 | 0.45 ± 0.00 |
| 174 | 118173083 | 32.57 | 81 | Selin-6-en-4α-ol | 0.01 ± 0.00 | 0.01 ± 0.00 |
| 175 | 997284493 | 32.94 | 151 | (1R,4R,5R,7R)-1-Isopropyl-4,8-dimethyl-spiro[4.5]dec-8-en-7-ol | 0.01 ± 0.00 | 0.01 ± 0.00 |
| 176 | 58334557 | 32.96 | 69 | Zingiberenol | 0.02 ± 0.00 | 0.01 ± 0.00 |
| 177 | 489394 | 33.40 | 41 | Aromandendrene | 0.03 ± 0.00 | 0.01 ± 0.00 |
| 178 | 997214046 | 33.47 | 157 | Cadala-1(10),3,8-triene | 0.00 ± 0.00 | 0.01 ± 0.00 |
| 179 | 465281 | 33.67 | 161 | Carotol | 0.03 ± 0.00 | 0.01 ± 0.00 |
| 180 | 552023 | 33.67 | 43 | Viridiflorol | 0.03 ± 0.00 | 0.01 ± 0.00 |
| 181 | 124821085 | 36.75 | 257 | (+-)-cis-3,4,6,9-tetrahydro-10-hydroxy-1,3,8-trimethyl-1H-naphtho[2,3-c]pyran-6,9-dione | 0.00 ± 0.00 | 0.00 ± 0.00 |
| 182 | 1686675 | 37.48 | 257 | Rimuen | 0.28 ± 0.00 | 0.17 ± 0.00 |
| 183 | 39702288 | 37.89 | 257 | Isopimara-9(11),15-diene | 0.01 ± 0.00 | 0.00 ± 0.01 |
| 184 | 5939628 | 38.47 | 272 | Cupressene | 0.02 ± 0.00 | 0.01 ± 0.00 |
| 185 | 5947502 | 38.48 | 94 | Kaur-15-ene | 0.03 ± 0.00 | 0.01 ± 0.00 |
| 186 | 92857255 | 38.66 | 149 | 7-(2-Hydroxypropan-2-yl)-1,4a-dimethyldecahydronaphthalen-1-ol | 0.00 ± 0.00 | 0.01 ± 0.00 |
| 187 | 5957335 | 39.10 | 257 | Biformene | 0.22 ± 0.00 | 0.01 ± 0.00 |
| 188 | 25269174 | 39.12 | 43 | Thunbergol | 0.05 ± 0.00 | 0.00 ± 0.00 |
| 189 | 997276327 | 39.28 | 43 | 7-Hydroxyfarnesen | 0.00 ± 0.00 | 0.01 ± 0.00 |
| 190 | 4666846 | 40.40 | 149 | Cryptomeridiol | 0.01 ± 0.00 | 0.01 ± 0.00 |
| 191 | 511024 | 40.68 | 257 | Sclarene | 0.04 ± 0.00 | 0.02 ± 0.00 |
| 192 | 77171552 | 40.90 | 43 | (-)-Spathulenol | 0.00 ± 0.00 | 0.01 ± 0.00 |
| 193 | 20070615 | 41.48 | 41 | Phyllocladene | 0.31 ± 0.00 | 0.12 ± 0.00 |
| 194 | 20016722 | 42.26 | 69 | p-Camphorene | 0.47 ± 0.00 | 0.38 ± 0.00 |
| 195 | 562287 | 42.27 | 257 | Kaur-16-ene | 0.71 ± 0.00 | 0.56 ± 0.00 |
| 196 | 281232 | 42.93 | 136 | Adamantane | 0.00 ± 0.00 | 0.01 ± 0.00 |
| 197 | 19407284 | 43.43 | 255 | Dehydroabietane | 0.04 ± 0.00 | 0.02 ± 0.00 |
| 198 | 14699322 | 46.56 | 275 | Nezukol | 0.04 ± 0.00 | 0.01 ± 0.00 |

The average of 5 technical sample replicates ± standard deviation is reported. Individual peak abundance is expressed as a relative percentage of total peak height of all compounds detected.
