# Supplementary material for: <em>Leptospermum scoparium</em> (Mānuka) and <em>Cryptomeria japonica</em> (Sugi) Leaf Essential Oil Seasonal Chemical Variation and Their Effect on Antimicrobial Activity
Source: Preprints.org preprint supplement (doi:10.20944/preprints202008.0623.v1), 2020-08-27
Supplement: Supplementary file 3 [file Supplementary material 2.docx]

**Supplementary Material 2**

Total composition of Mānuka leaf essential oils obtained via steam distillation in February, May and August analysed through Gas chromatography – Mass spectrometry. The relative proportions (% of total area) of each compound identified by the NIST 2017 mass spectral library are reported.

| **No.** | **CAS No.** | **RT** | **m/z** | **Compound** | **Average Peak Area (%)** | | |
| --- | --- | --- | --- | --- | --- | --- | --- |
| **Feb** | **May** | **August** |
| 1 | 2867052 | 4.15 | 93 | α-Thujene | 0.85 ± 0.03 | 0.60 ± 0.01 | 1.33 ± 0.03 |
| 2 | 80568 | 4.27 | 93 | α-Pinene | 12.79 ± 0.19 | 11.58 ± 0.25 | 15.71 ± 0.14 |
| 3 | 629209 | 4.40 | 104 | 1,3,5,7-Cyclooctatetraene | 0.09 ± 0.01 | 0.12 ± 0.01 | 0.09 ± 0.01 |
| 4 | 6728263 | 4.55 | 41 | 2-Hexenal, (E)- | 0.00 ± 0.00 | 0.00 ± 0.00 | 0.00 ± 0.00 |
| 5 | 79925 | 4.62 | 93 | Camphene | 0.14 ± 0.01 | 0.08 ± 0.00 | 0.25 ± 0.01 |
| 6 | 111273 | 4.74 | 56 | 1-Hexanol | 0.01 ± 0.00 | 0.01 ± 0.00 | 0.01 ± 0.00 |
| 7 | 36262096 | 4.85 | 91 | Thuja-2,4(10)-diene | 0.04 ± 0.00 | 0.03 ± 0.00 | 0.06 ± 0.00 |
| 8 | 18172673 | 5.21 | 93 | β-Pinene | 11.72 ± 0.35 | 4.22 ± 0.03 | 15.80 ± 0.32 |
| 9 | 123353 | 5.61 | 93 | β-Myrcene | 3.69 ± 0.16 | 4.92 ± 0.04 | 2.90 ± 0.09 |
| 10 | 99832 | 5.87 | 93 | α-Phellandrene | 0.11 ± 0.01 | 0.08 ± 0.00 | 0.16 ± 0.01 |
| 11 | 3777693 | 5.93 | 81 | 2-Pentylfuran | 0.04 ± 0.00 | 0.03 ± 0.00 | 0.05 ± 0.00 |
| 12 | 997044487 | 6.01 | 119 | Mentha-1,4,8-triene | 0.01 ± 0.00 | 0.00 ± 0.00 | 0.01 ± 0.00 |
| 13 | 21195595 | 6.01 | 91 | p-Mentha-1,3,8-triene | 0.01 ± 0.00 | 0.01 ± 0.00 | 0.01 ± 0.00 |
| 14 | 13679862 | 6.13 | 67 | tetrahydro-5-isopropenyl-2-methyl-2-vinylfuran | 0.02 ± 0.00 | 0.01 ± 0.00 | 0.02 ± 0.00 |
| 15 | 586629 | 6.21 | 121 | α-Terpinolene | 0.39 ± 0.02 | 0.25 ± 0.00 | 0.48 ± 0.03 |
| 16 | 5989275 | 6.43 | 68 | D-Limonene | 1.42 ± 0.07 | 0.90 ± 0.02 | 2.30 ± 0.06 |
| 17 | 3387415 | 6.65 | 93 | β-Sabinene | 0.18 ± 0.01 | 0.10 ± 0.00 | 0.29 ± 0.01 |
| 18 | 99876 | 6.91 | 119 | p-Cymene | 2.49 ± 0.06 | 2.02 ± 0.02 | 3.71 ± 0.06 |
| 19 | 470826 | 6.95 | 43 | Eucalyptol | 2.44 ± 0.08 | 1.40 ± 0.02 | 4.25 ± 0.07 |
| 20 | 3681718 | 7.14 | 43 | cis-3-Hexenyl Acetate | 0.21 ± 0.01 | 0.18 ± 0.00 | 0.08 ± 0.01 |
| 21 | 3779611 | 7.20 | 93 | (E)- β-Ocymene | 0.28 ± 0.01 | 0.49 ± 0.02 | 0.13 ± 0.01 |
| 22 | 99854 | 7.32 | 93 | γ-Terpinene | 1.52 ± 0.05 | 1.07 ± 0.03 | 1.94 ± 0.07 |
| 23 | 1120214 | 7.64 | 57 | Undecane | 0.00 ± 0.00 | 0.00 ± 0.00 | 0.00 ± 0.00 |
| 24 | 586630 | 8.16 | 93 | Isoterpinolene | 0.37 ± 0.01 | 0.23 ± 0.01 | 0.48 ± 0.02 |
| 25 | 60415614 | 8.26 | 70 | 1-Methylbutyl butyrate | 0.01 ± 0.00 | 0.01 ± 0.00 | 0.00 ± 0.00 |
| 26 | 2408379 | 8.38 | 82 | 2,2,6-Trimethylcyclohexan-1-one | 0.00 ± 0.00 | 0.00 ± 0.00 | 0.00 ± 0.00 |
| 27 | 2437970 | 8.51 | 79 | Pinol | 0.03 ± 0.00 | 0.03 ± 0.00 | 0.03 ± 0.00 |
| 28 | 997042023 | 9.31 | 132 | p-(1-Propenyl)-toluene | 0.06 ± 0.00 | 0.04 ± 0.00 | 0.08 ± 0.01 |
| 29 | 5989333 | 9.42 | 59 | trans-Linalool oxide (furanoid) | 0.01 ± 0.00 | 0.00 ± 0.00 | 0.01 ± 0.00 |
| 30 | 27625350 | 9.53 | 70 | Butanoic acid, 2-methyl-, 3-methylbutyl ester | 0.03 ± 0.00 | 0.01 ± 0.00 | 0.00 ± 0.00 |
| 31 | 659701 | 9.78 | 70 | Isoamyl isovalerate | 0.07 ± 0.00 | 0.05 ± 0.00 | 0.03 ± 0.00 |
| 32 | 111875 | 10.33 | 41 | 1-Octanol | 0.01 ± 0.00 | 0.01 ± 0.00 | 0.01 ± 0.00 |
| 33 | 54410945 | 10.42 | 68 | Butanoic acid, 3-methyl-, 3-methyl-3-butenyl ester | 0.07 ± 0.00 | 0.05 ± 0.00 | 0.01 ± 0.00 |
| 34 | 33171492 | 10.46 | 108 | α-Campholenal | 0.01 ± 0.00 | 0.01 ± 0.00 | 0.01 ± 0.00 |
| 35 | 124196 | 10.73 | 57 | Nonanal | 0.02 ± 0.00 | 0.01 ± 0.00 | 0.02 ± 0.00 |
| 36 | 78706 | 10.91 | 71 | Linalool | 2.19 ± 0.07 | 1.52 ± 0.04 | 3.02 ± 0.08 |
| 37 | 112403 | 11.00 | 57 | Dodecane | 0.01 ± 0.00 | 0.01 ± 0.00 | 0.01 ± 0.00 |
| 38 | 2217029 | 11.91 | 81 | Fenchol | 0.03 ± 0.00 | 0.02 ± 0.00 | 0.05 ± 0.00 |
| 39 | 4501580 | 11.97 | 108 | α-Campholenal | 0.10 ± 0.00 | 0.07 ± 0.00 | 0.10 ± 0.00 |
| 40 | 547615 | 12.45 | 92 | (E)-Pinocarveol | 0.02 ± 0.00 | 0.01 ± 0.00 | 0.02 ± 0.00 |
| 41 | NA | 12.80 | 71 | Exo-methylcamphenilol | 0.01 ± 0.00 | 0.01 ± 0.00 | 0.01 ± 0.00 |
| 42 | 562743 | 13.40 | 71 | Terpinen-4-ol | 0.29 ± 0.01 | 0.23 ± 0.01 | 0.47 ± 0.02 |
| 43 | 66917622 | 13.54 | 55 | Isoamyl tiglate | 0.06 ± 0.00 | 0.04 ± 0.00 | 0.02 ± 0.00 |
| 44 | 41519180 | 13.55 | 83 | Isoamyl angelate | 0.00 ± 0.00 | 0.00 ± 0.00 | 0.00 ± 0.00 |
| 45 | 18829566 | 13.80 | 41 | 2-Nonenal, (E)- | 0.00 ± 0.00 | 0.00 ± 0.00 | 0.00 ± 0.00 |
| 46 | 106229 | 14.34 | 69 | Citronellol | 0.01 ± 0.00 | 0.02 ± 0.00 | 0.01 ± 0.00 |
| 47 | 4764141 | 14.60 | 41 | Myrtanal | 0.01 ± 0.00 | 0.01 ± 0.00 | 0.01 ± 0.00 |
| 48 | 470086 | 14.73 | 59 | (1S)-1,3,3-trimethylnorbornan-2-ol | 0.45 ± 0.00 | 0.31 ± 0.01 | 0.75 ± 0.02 |
| 49 | 564943 | 15.19 | 79 | Myrtenal | 0.09 ± 0.00 | 0.08 ± 0.00 | 0.35 ± 0.01 |
| 50 | 29548149 | 15.36 | 94 | Carvomenthenal | 0.02 ± 0.00 | 0.02 ± 0.00 | 0.01 ± 0.00 |
| 51 | 19894974 | 15.49 | 79 | (-)-Myrtenol | 0.11 ± 0.01 | 0.13 ± 0.01 | 0.47 ± 0.01 |
| 52 | 1197019 | 15.75 | 43 | p-Cymen-8-ol | 0.01 ± 0.00 | 0.01 ± 0.00 | 0.01 ± 0.00 |
| 53 | 83783862 | 15.85 | 69 | 2-Butenoic acid, 2-methyl-, 3-methyl-2-butenyl ester, (E)- | 0.01 ± 0.00 | 0.01 ± 0.00 | 0.00 ± 0.00 |
| 54 | 128507 | 15.94 | 95 | 2-Norpinene-2-ethanol | 0.01 ± 0.00 | 0.02 ± 0.00 | 0.02 ± 0.00 |
| 55 | 1197075 | 16.41 | 109 | trans-Carveol | 0.01 ± 0.00 | 0.01 ± 0.00 | 0.02 ± 0.00 |
| 56 | 1117619 | 16.60 | 69 | (R)-citronellol | 0.02 ± 0.00 | 0.02 ± 0.00 | 0.05 ± 0.00 |
| 57 | 20307840 | 17.04 | 121 | δ-Elemene | 0.06 ± 0.00 | 0.08 ± 0.00 | 0.03 ± 0.00 |
| 58 | 17699148 | 17.34 | 105 | α-Cubebene | 2.48 ± 0.01 | 2.61 ± 0.03 | 1.77 ± 0.01 |
| 59 | 106263 | 17.50 | 41 | β-Citral | 0.02 ± 0.00 | 0.01 ± 0.00 | 0.02 ± 0.00 |
| 60 | 106241 | 17.72 | 69 | Geraniol | 0.05 ± 0.00 | 0.05 ± 0.01 | 0.07 ± 0.00 |
| 61 | 107853703 | 17.93 | 43 | (Z)-Undec-6-en-2-one | 0.38 ± 0.01 | 0.50 ± 0.02 | 0.23 ± 0.01 |
| 62 | 138530446 | 17.96 | 91 | Myrtenyl 2-methyl butyrate | 0.06 ± 0.00 | 0.04 ± 0.00 | 0.10 ± 0.00 |
| 63 | 14912448 | 18.18 | 105 | Ylangene | 0.82 ± 0.01 | 1.05 ± 0.03 | 0.39 ± 0.00 |
| 64 | 3856255 | 18.38 | 161 | Copaene | 1.92 ± 0.03 | 2.33 ± 0.03 | 1.43 ± 0.02 |
| 65 | 141275 | 18.81 | 69 | α-Citral | 0.03 ± 0.00 | 0.02 ± 0.00 | 0.03 ± 0.00 |
| 66 | 1189099 | 18.90 | 69 | trans-Geranic acid methyl ester | 0.14 ± 0.00 | 0.19 ± 0.01 | 0.24 ± 0.00 |
| 67 | 1079012 | 18.99 | 91 | Myrtenyl acetate | 0.73 ± 0.01 | 0.46 ± 0.01 | 2.66 ± 0.02 |
| 68 | 3650280 | 19.08 | 108 | (+)-Sativene | 0.03 ± 0.00 | 0.04 ± 0.00 | 0.01 ± 0.00 |
| 70 | 13744155 | 19.42 | 161 | β-Cubebene | 0.06 ± 0.00 | 0.07 ± 0.00 | 0.06 ± 0.00 |
| 71 | 489292 | 19.65 | 105 | β-Maaliene | 0.49 ± 0.01 | 0.48 ± 0.01 | 0.20 ± 0.00 |
| 72 | 515139 | 19.75 | 81 | β-Elemene | 0.50 ± 0.01 | 0.87 ± 0.02 | 0.42 ± 0.01 |
| 73 | 2792394 | 19.94 | 43 | 2,6-Dimethyl 2,6-octadiene | 0.01 ± 0.00 | 0.00 ± 0.00 | 0.02 ± 0.00 |
| 74 | 13877935 | 20.09 | 93 | cis-Caryophyllene | 0.02 ± 0.00 | 0.02 ± 0.00 | 0.01 ± 0.00 |
| 75 | 1754627 | 20.14 | 131 | Methyl cinnamate | 0.03 ± 0.00 | 0.04 ± 0.00 | 0.02 ± 0.00 |
| 76 | 20479065 | 20.39 | 120 | β-Ylangene | 0.09 ± 0.00 | 0.11 ± 0.00 | 0.05 ± 0.00 |
| 77 | 141128 | 20.53 | 69 | Nerol acetate | 0.03 ± 0.00 | 0.01 ± 0.00 | 0.05 ± 0.00 |
| 78 | 17334553 | 20.70 | 161 | β-Gurjunene | 0.07 ± 0.00 | 0.05 ± 0.00 | 0.03 ± 0.00 |
| 79 | 87445 | 20.89 | 93 | Caryophyllene | 2.92 ± 0.05 | 3.15 ± 0.02 | 2.11 ± 0.02 |
| 80 | 3691121 | 21.06 | 105 | α-Guaiene | 0.03 ± 0.00 | 0.03 ± 0.00 | 0.02 ± 0.00 |
| 81 | 489394 | 21.19 | 41 | Aromandendrene | 0.20 ± 0.01 | 0.20 ± 0.00 | 0.09 ± 0.00 |
| 82 | 36577330 | 21.34 | 105 | Guaia-6,9-diene | 0.91 ± 0.02 | 1.20 ± 0.01 | 0.55 ± 0.01 |
| 83 | 997195261 | 21.44 | 43 | (-)-cis-Myrtanyl acetate | 0.06 ± 0.00 | 0.05 ± 0.00 | 0.14 ± 0.00 |
| 84 | 267665203 | 21.74 | 161 | Cadina-3,5-diene | 4.36 ± 0.05 | 5.15 ± 0.05 | 1.75 ± 0.04 |
| 85 | 1461025 | 22.11 | 119 | α-Curcumene, dihydro- | 0.16 ± 0.01 | 0.15 ± 0.01 | 0.10 ± 0.00 |
| 86 | 25246279 | 22.19 | 41 | (+)-Aromadendrene | 0.13 ± 0.00 | 0.14 ± 0.00 | 0.09 ± 0.00 |
| 87 | 6753986 | 22.32 | 93 | α-Humulene | 1.21 ± 0.03 | 1.35 ± 0.02 | 1.14 ± 0.01 |
| 88 | 16729003 | 22.35 | 161 | Cadina-1(6),4-diene | 2.68 ± 0.08 | 3.04 ± 0.10 | 0.87 ± 0.01 |
| 89 | 103827221 | 22.70 | 189 | 4,11-selinadiene | 0.87 ± 0.03 | 1.47 ± 0.02 | 0.52 ± 0.01 |
| 90 | 23986745 | 22.77 | 161 | (-)-Germacrene D | 0.13 ± 0.00 | 0.17 ± 0.00 | 0.06 ± 0.00 |
| 91 | 20085192 | 22.91 | 105 | α-Amorphene | 1.20 ± 0.03 | 1.47 ± 0.01 | 0.79 ± 0.01 |
| 92 | 3691110 | 23.20 | 107 | δ-Guaiene | 0.04 ± 0.00 | 0.05 ± 0.00 | 0.03 ± 0.00 |
| 93 | 95910364 | 23.30 | 161 | Isoledene | 0.14 ± 0.00 | 0.16 ± 0.00 | 0.10 ± 0.00 |
| 94 | 17066670 | 23.39 | 93 | β-Selinene | 1.34 ± 0.03 | 1.99 ± 0.04 | 0.98 ± 0.02 |
| 95 | 10219757 | 23.50 | 107 | (+)-Eremorphilene | 1.23 ± 0.02 | 1.81 ± 0.03 | 0.91 ± 0.01 |
| 96 | 88846 | 23.78 | 105 | β-Guaiene | 1.72 ± 0.04 | 2.26 ± 0.02 | 1.12 ± 0.02 |
| 97 | 473132 | 23.80 | 41 | α-Selinene | 0.90 ± 0.03 | 1.23 ± 0.03 | 0.65 ± 0.01 |
| 98 | 5956092 | 24.00 | 207 | β-Agarofuran, dihydro- | 0.02 ± 0.00 | 0.04 ± 0.00 | 0.03 ± 0.00 |
| 99 | 100762467 | 24.15 | 121 | Bicyclogermacrene | 0.17 ± 0.01 | 0.21 ± 0.01 | 0.16 ± 0.00 |
| 100 | 39029419 | 24.38 | 161 | γ-Cadinene | 0.31 ± 0.01 | 0.37 ± 0.01 | 0.14 ± 0.00 |
| 101 | 502614 | 24.50 | 41 | α-Farnesene | 0.19 ± 0.01 | 0.25 ± 0.01 | 0.09 ± 0.00 |
| 102 | 110823682 | 24.59 | 81 | β-Elemene | 0.38 ± 0.01 | 0.53 ± 0.01 | 0.23 ± 0.01 |
| 103 | 483761 | 24.64 | 161 | δ-Cadinene | 1.79 ± 0.05 | 2.12 ± 0.05 | 1.05 ± 0.04 |
| 104 | 154098143 | 24.78 | 159 | Aristolediene | 0.06 ± 0.00 | 0.07 ± 0.00 | 0.04 ± 0.00 |
| 105 | 41929059 | 24.83 | 161 | Zonarene | 1.23 ± 0.02 | 1.54 ± 0.03 | 0.50 ± 0.01 |
| 106 | 16728997 | 25.14 | 119 | Cadine-1,4-diene | 2.78 ± 0.08 | 3.29 ± 0.06 | 1.52 ± 0.04 |
| 107 | 6813214 | 25.27 | 161 | Selina-3,7(11)-diene | 0.05 ± 0.00 | 0.08 ± 0.00 | 0.03 ± 0.00 |
| 108 | 483772 | 25.59 | 159 | Calamenene | 15.14 ± 0.41 | 16.37 ± 0.19 | 13.12 ± 0.36 |
| 109 | 997276461 | 25.91 | 41 | Isoshyobunone | 0.01 ± 0.00 | 0.01 ± 0.00 | 0.01 ± 0.00 |
| 110 | 72937554 | 25.99 | 159 | cis-Calamenene | 0.02 ± 0.00 | 0.02 ± 0.00 | 0.01 ± 0.00 |
| 111 | 29873992 | 26.40 | 121 | γ-Elemene | 0.05 ± 0.00 | 0.06 ± 0.00 | 0.03 ± 0.00 |
| 112 | 78204623 | 26.41 | 157 | α-Dehydro-ar-himachalene | 0.36 ± 0.01 | 0.41 ± 0.00 | 0.37 ± 0.01 |
| 113 | 21391991 | 26.55 | 157 | α-Calacorene | 1.13 ± 0.03 | 1.50 ± 0.02 | 0.69 ± 0.02 |
| 114 | 1460964 | 26.88 | 187 | α-Calamene | 0.01 ± 0.00 | 0.01 ± 0.00 | 0.00 ± 0.00 |
| 115 | 37526888 | 27.25 | 91 | Benzyl tiglate | 0.06 ± 0.00 | 0.08 ± 0.00 | 0.02 ± 0.00 |
| 116 | 50277344 | 27.50 | 157 | β-Calacorene | 0.13 ± 0.01 | 0.17 ± 0.00 | 0.08 ± 0.00 |
| 117 | 997276251 | 27.90 | 105 | 5,11-Epoxycadin-1(10)-ene | 0.01 ± 0.00 | 0.01 ± 0.00 | 0.01 ± 0.00 |
| 118 | 577275 | 28.15 | 122 | Ledol | 0.01 ± 0.00 | 0.01 ± 0.00 | 0.01 ± 0.00 |
| 119 | 552023 | 28.24 | 109 | Viridiflorol | 0.01 ± 0.00 | 0.01 ± 0.00 | 0.01 ± 0.00 |
| 120 | 88728589 | 28.33 | 43 | Epiglobulol | 0.01 ± 0.00 | 0.01 ± 0.00 | 0.00 ± 0.00 |
| 121 | 22595455 | 28.67 | 252 | Flavesone | 0.17 ± 0.00 | 0.29 ± 0.01 | 0.08 ± 0.00 |
| 122 | 29837125 | 28.70 | 119 | Cubenene | 0.05 ± 0.00 | 0.07 ± 0.00 | 0.03 ± 0.00 |
| 123 | 639996 | 28.86 | 93 | 10-epi-Elemol | 0.08 ± 0.00 | 0.11 ± 0.00 | 0.18 ± 0.01 |
| 124 | 997318356 | 29.07 | 174 | 7,10-Bisepoxy-1,10-seco-calamenene | 0.01 ± 0.00 | 0.01 ± 0.00 | 0.00 ± 0.00 |
| 125 | 72203997 | 29.30 | 121 | Axenol | 0.09 ± 0.00 | 0.12 ± 0.00 | 0.05 ± 0.00 |
| 126 | 489418 | 29.65 | 43 | (-)-Globulol | 0.04 ± 0.00 | 0.06 ± 0.00 | 0.03 ± 0.00 |
| 127 | 6750603 | 29.76 | 119 | Spathulenol | 0.07 ± 0.00 | 0.09 ± 0.00 | 0.07 ± 0.00 |
| 128 | 1139306 | 29.82 | 43 | Caryophyllene oxide | 0.22 ± 0.00 | 0.25 ± 0.01 | 0.16 ± 0.00 |
| 129 | 20129399 | 29.97 | 185 | α-Corocalene | 0.05 ± 0.00 | 0.07 ± 0.00 | 0.04 ± 0.00 |
| 130 | 489861 | 30.11 | 161 | Guaiol | 0.12 ± 0.00 | 0.20 ± 0.01 | 0.30 ± 0.01 |
| 131 | 73365772 | 30.52 | 119 | diepi-Cubenol | 0.24 ± 0.01 | 0.31 ± 0.01 | 0.15 ± 0.00 |
| 132 | 765307457 | 30.75 | 207 | 4-Epi-cis-Dihydroagarofuran | 0.03 ± 0.00 | 0.07 ± 0.00 | 0.02 ± 0.00 |
| 133 | 56324697 | 30.88 | 149 | 1H-Indene, 1-ethylideneoctahydro-7a-methyl-, cis- | 0.94 ± 0.04 | 1.28 ± 0.07 | 1.57 ± 0.06 |
| 134 | 257293906 | 30.99 | 159 | Muurola-4,10(14)-dien-1β-ol | 0.01 ± 0.00 | 0.01 ± 0.00 | 0.01 ± 0.00 |
| 135 | 5937111 | 31.10 | 161 | **τ**-Cadinol | 0.04 ± 0.00 | 0.07 ± 0.00 | 0.03 ± 0.00 |
| 136 | 5009052 | 31.26 | 266 | Isoleptospermone | 0.14 ± 0.01 | 0.19 ± 0.00 | 0.05 ± 0.00 |
| 137 | 1209718 | 31.41 | 189 | γ-Eudesmol | 0.61 ± 0.02 | 0.88 ± 0.00 | 1.03 ± 0.04 |
| 138 | 27862073 | 31.54 | 105 | Aristolene | 0.11 ± 0.00 | 0.18 ± 0.00 | 0.17 ± 0.01 |
| 139 | 567759 | 31.67 | 196 | Leptospermone | 0.61 ± 0.03 | 0.85 ± 0.02 | 0.26 ± 0.00 |
| 140 | 23811087 | 31.86 | 161 | Hinesol | 0.06 ± 0.00 | 0.10 ± 0.00 | 0.09 ± 0.00 |
| 141 | 30021740 | 32.03 | 161 | γ-Cadinene | 0.03 ± 0.00 | 0.04 ± 0.00 | 0.02 ± 0.00 |
| 142 | 481345 | 32.24 | 43 | α-Cadinol | 0.04 ± 0.00 | 0.07 ± 0.00 | 0.03 ± 0.00 |
| 143 | 19912620 | 32.25 | 95 | **τ**-Muurolol | 0.06 ± 0.00 | 0.11 ± 0.00 | 0.04 ± 0.00 |
| 144 | 28305604 | 32.28 | 177 | β-Oplopenone | 0.04 ± 0.00 | 0.04 ± 0.00 | 0.02 ± 0.00 |
| 145 | 473165 | 32.52 | 59 | α-Eudesmol | 1.12 ± 0.05 | 1.65 ± 0.02 | 1.86 ± 0.07 |
| 146 | 5945722 | 32.73 | 81 | Neointermedeol | 0.08 ± 0.00 | 0.19 ± 0.00 | 0.08 ± 0.00 |
| 147 | 997283168 | 32.87 | 175 | 3-[2-(1-Hydroxy-1-methylethyl)phenyl]-3-pentanol | 0.02 ± 0.00 | 0.02 ± 0.00 | 0.01 ± 0.00 |
| 148 | 123932456 | 33.20 | 157 | 10-Hydroxycalamene, cis- | 0.04 ± 0.00 | 0.04 ± 0.00 | 0.02 ± 0.00 |
| 149 | 22291550 | 34.70 | 133 | 3-(2-Isopropyl-5-methylphenyl)-2-methylpropionic acid | 0.01 ± 0.00 | 0.01 ± 0.00 | 0.01 ± 0.00 |
| 150 | 57494107 | 35.71 | 159 | 10-nor-Calamenen-10-one | 0.01 ± 0.00 | 0.01 ± 0.00 | 0.01 ± 0.00 |
| 151 | 562232 | 37.02 | 91 | Eremophilone | 0.00 ± 0.00 | 0.01 ± 0.00 | 0.00 ± 0.00 |
| 152 | 63180336 | 37.22 | 164 | Muurol-5-en-4-one <cis-14-nor-> | 0.01 ± 0.00 | 0.02 ± 0.00 | 0.01 ± 0.00 |
| 153 | 120514 | 37.50 | 105 | Benzyl Benzoate | 0.02 ± 0.00 | 0.03 ± 0.00 | 0.01 ± 0.00 |
| 154 | 55012721 | 40.07 | 175 | 5-Hydroxycalamenene | 0.04 ± 0.00 | 0.05 ± 0.00 | 0.03 ± 0.00 |
| 155 | 997176650 | 40.63 | 175 | 3,3,5,6,8,8-hexamethyltricyclo[5.1.0.02,4]oct-5-ene | 0.01 ± 0.00 | 0.01 ± 0.00 | 0.01 ± 0.00 |
| 156 | 562287 | 42.35 | 257 | Kaur-16-ene | 0.00 ± 0.00 | 0.00 ± 0.00 | 0.01 ± 0.00 |
| 157 | 50861535 | 50.28 | 91 | Grandiflorone | 0.02 ± 0.00 | 0.03 ± 0.01 | 0.00 ± 0.00 |

The average of 5 technical sample replicates ± standard deviation is reported. Individual peak abundance is expressed as a relative percentage of total peak height of all compounds detected.
