# Supplementary material for: <em>Leptospermum scoparium</em> (Mānuka) and <em>Cryptomeria japonica</em> (Sugi) Leaf Essential Oil Seasonal Chemical Variation and Their Effect on Antimicrobial Activity
Source: Preprints.org preprint supplement (doi:10.20944/preprints202008.0623.v1), 2020-08-27
Supplement: Supplementary file 4 [file Supplementary material 3.docx]

**Supplementary Material 3**

Result of Pearson’s correlation analysis of minimum inhibitory concentration and proportion of Sugi oil constituents identified by Gas chromatography – Mass spectrometry. *Only components with correlation coefficients > 0.75 is reported.

| **Compound Name** | | **Correlation   Coefficient** | **February % Proportion** | **August % Proportion** |
| --- | --- | --- | --- | --- |
| p-Cymene | -0.99997 | | 10.51577064 | 1.489334438 |
| γ-Terpinene | -0.99093 | | 9.954527903 | 9.278800632 |
| Terpinen-4-ol | -0.99949 | | 6.643422781 | 4.21632321 |
| D-Limonene | -0.99687 | | 6.424707426 | 5.01821959 |
| Camphene | -0.93812 | | 3.150079084 | 2.961883994 |
| Isoterpinolene | -0.9776 | | 2.903037056 | 2.715288163 |
| Linalool | -0.99789 | | 0.775684453 | 0.502870751 |
| α-Fenchol | -0.99959 | | 0.569606204 | 0.246776692 |
| Santrolina triene | -0.9981 | | 0.439570306 | 0.188948625 |
| cis-p-Menth-2-en-1-ol | -0.98959 | | 0.171247346 | 0.150244574 |
| p-Menth-2-ene-1,4-diol, trans- | -0.99922 | | 0.159455846 | 0.011908223 |
| 2-Methyl-2-cyclohexen-1-ol | -0.9985 | | 0.154079408 | 0.000902115 |
| 2-ethyl-4-methyl-2-imidazoline | -0.99949 | | 0.147603496 | 0.001013779 |
| Isolimonene | -0.99636 | | 0.141747146 | 0.058411961 |
| (3S,4S)-Hept-1-en-6-yne-3,4-diol | -0.99738 | | 0.135040526 | 0.014659232 |
| 1-Octen-3-ol | -0.99731 | | 0.116063991 | 0.012530641 |
| Calamenene | -0.9972 | | 0.11113756 | 0.013183272 |
| m-Cymen-8-ol | -0.99941 | | 0.110243795 | 0.014418588 |
| p-Menth-1-en-3-ol, trans- | -0.86272 | | 0.101679343 | 0.089055815 |
| (anti)-7-Hydroxy-nor-bornene | -0.99973 | | 0.082219192 | 0.002402539 |
| p-Menth-1-en-3-ol | -0.94057 | | 0.068361517 | 0.059938318 |
| Camphor | -0.99368 | | 0.059100655 | 0.035184568 |
| alpha cedrene | -0.96605 | | 0.054202715 | 0.043933547 |
| p-Menth-2-en-1-ol, trans | -0.9795 | | 0.048697622 | 0.046716607 |
| 1-(1,2,3-Trimethyl-cyclopent-2-enyl)-   ethanone | -0.99675 | | 0.034063336 | 0.002515297 |
| 2-Norbornanol | -0.99741 | | 0.033037306 | 0.014440454 |
| 1-Hexanol | -0.9905 | | 0.031997683 | 0.003187655 |
| Furan, 2-ethyl-5-methyl- | -0.99902 | | 0.031547962 | 0.000980343 |
| p-Menthan-3-one | -0.98104 | | 0.028330322 | 0.019038725 |
| Cyclooctanone | -0.9888 | | 0.023477179 | 0.001114875 |
| 2-Caren-4-ol | -0.99698 | | 0.021665808 | 0.001446399 |
| Dihydroisophorone | -0.99753 | | 0.020948913 | 0.004406518 |
| trans-2-Hexenol | -0.99215 | | 0.020403287 | 0.000337718 |
| Sabinyl isobutanoate | -0.99526 | | 0.019499559 | 0.008558345 |
| Nerolidyl acetate | -0.99549 | | 0.017321776 | 0.005841593 |
| Dodecane | -0.98317 | | 0.016837697 | 0.003384498 |
| (-)-m-Menthadien-6-trans-ol | -0.99774 | | 0.015020746 | 0.000326588 |
| Caryophyllene oxide | -0.99262 | | 0.014559345 | 0.00447945 |
| Cyclopentanone, 2-acetyl- | -0.9992 | | 0.014225699 | 0.000639439 |
| Octanoic acid, methyl ester | -0.99651 | | 0.014161638 | 0.002920757 |
| p-Cymen-3-ol | -0.99587 | | 0.013743744 | 0.002917961 |
| (1S,2S,5R)-2-Methyl-5-(propan-2-yl)cyclohex-3-ene-1,2-diol | -0.99607 | | 0.013218991 | 0.00010821 |
| 5-Ocen-2-yn-4-ol | -0.99659 | | 0.012230531 | 0.000488034 |
| 2,3,4-Trimethyl-2-cyclopenten-1-one | -0.99248 | | 0.011895668 | 0.002693708 |
| Adamantane | -0.99736 | | 0.010902647 | 0.000195159 |
| 7-Hydroxyfarnesen | -0.9897 | | 0.010614145 | 0.000745114 |
| Cryptomeridiol | -0.99357 | | 0.010238139 | 0.005094827 |
| Bicyclo[4.1.0]heptan-3-ol, 4,7,7-trimethyl-, [1R-(1.alpha.,3.alpha.,4.beta.,6.alpha.)]- | -0.99094 | | 0.009952002 | 0.002989133 |
| 4(10)-Thujen-3-ol, acetate | -0.9966 | | 0.009827386 | 0.001074242 |
| 1,3-Cyclopentadiene, trimethyl- | -0.99276 | | 0.009558368 | 0.003156031 |
| 3-Methylcyclohex-3-en-1-one | -0.99152 | | 0.009318026 | 0.000874501 |
| 1,8-menthadien-4-ol | -0.9767 | | 0.009050052 | 0.005372898 |
| 5-Octen-2-yn-4-ol | -0.99482 | | 0.0089428 | 0.000367694 |
| 7-(2-Hydroxypropan-2-yl)-1,4a-dimethyldecahydronaphthalen-1-ol | -0.95669 | | 0.008617997 | 0.004841131 |
| Cadala-1(10),3,8-triene | -0.99387 | | 0.007751724 | 0.000668424 |
| 5-Methylisocytosine | -0.98255 | | 0.007291284 | 0.000120926 |
| 1(7),5,8-o-Menthatriene | -0.95968 | | 0.007008311 | 0.002224195 |
| 3-Isopropyl-6-methyl-7-oxabicyclo[4.1.0]hept-3-ene | -0.97575 | | 0.006486056 | 0.002814883 |
| (-)-Spathulenol | -0.99794 | | 0.006454885 | 0.000543287 |
| Cyclohept-4-enone | -0.98203 | | 0.006066263 | 0.000657123 |
| p-Menth-4(8)-ene | -0.97991 | | 0.003981773 | 0.00086813 |
| Longifolene | -0.88243 | | 0.003833025 | 0.002612057 |
| 4(10)-Thujen-3-ol | -0.92611 | | 0.003435927 | 0.002220729 |
| 1,4-Dimethyl-δ-3-tetrahydroacetophenone | -0.987 | | 0.003128238 | 0.000212751 |
| cis-(-)-1,2-Epoxy-p-menth-8-ene | -0.97634 | | 0.003012261 | 0.000374024 |
